# Supplementary material for: Characterization of Aeromonas Isolates from Ornamental Fish: Species, Virulence Genes, and Antimicrobial Susceptibility
Source: MDPI journal article supplement (doi:10.3390/microorganisms12010176), 2024-01-16
Supplement: s1 [file s1]

## Supplementary material

**Figure S1:** Fish with clinical signs of ulcerative skin lesions (A - *Carassius auratus*, C - *Cyprinus carpio* var. koi), septicemia (B - *Cyprinus carpio* var. koi) and ocular lesion (D - *Carassius auratus* with exophthalmia and corneal opacity).

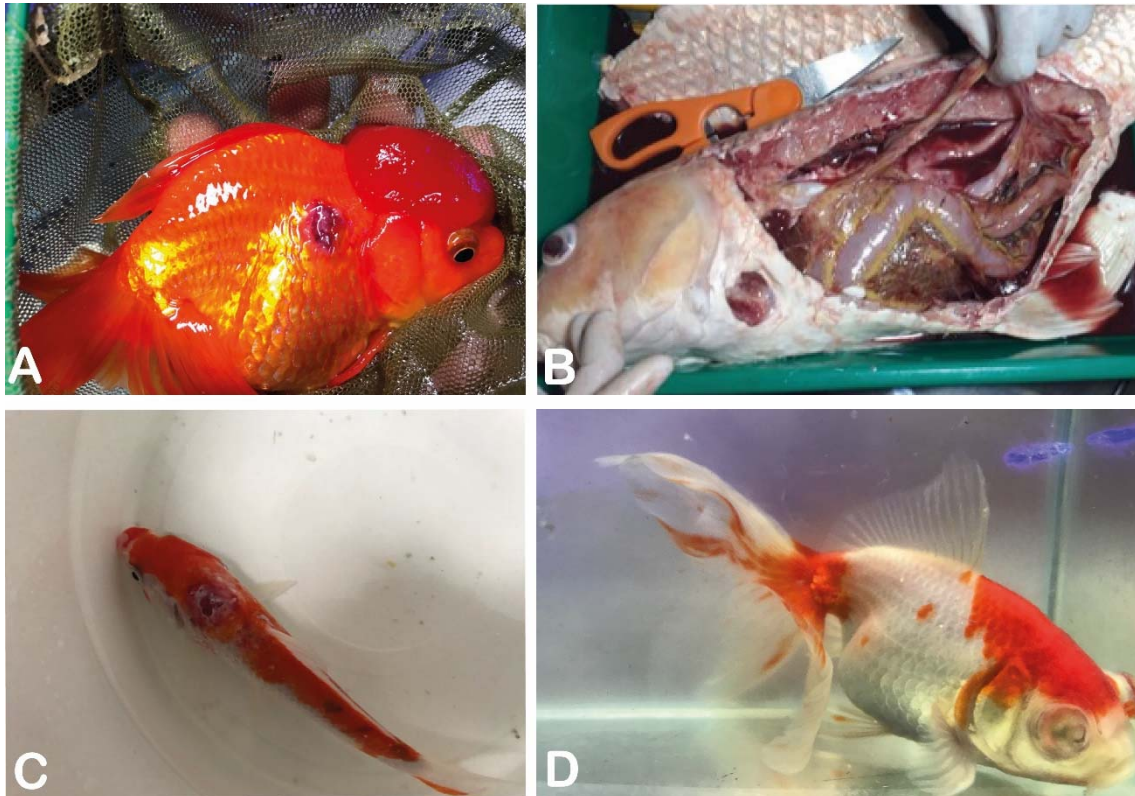

**Table S1:** Primers used to *Aeromonas* species identification and detection of virulence genes.

| Gene        | Target                            | Primer Sequence (5' – 3')                                                 | Amplicon (pb) | Reference |
|-------------|-----------------------------------|---------------------------------------------------------------------------|---------------|-----------|
| <i>gyrB</i> | <i>A. caviae</i>                  | TGCTGCTGACCATCCGC<br>GGTGCCTGCGGCTCG                                      | 70            | [13]      |
| <i>ahaI</i> | <i>A. hydrophila</i>              | GAGAAGGTGACCACCAAGAACA<br>GAGATGTCAGCCTTGTAGAGCT                          | 200           | [14]      |
| <i>rpoB</i> | <i>A. veronii</i>                 | CGTGCCGGCTTTGAAGTC<br>GATCACGTACTTGCCTTCTTCAATA                           | 224           | [13]      |
| <i>act</i>  | Cytotoxic enterotoxin             | AGAAGGTGACCACCAAGAACA<br>AACTGACATCGGCCTTGAAGTC                           | 232           | [48]      |
| <i>aer</i>  | Aerolysin                         | CCTATGGCCTGAGCGAGAAG<br>CCAGTTCCAGTCCCACCACT                              | 431           | [49]      |
| <i>alt</i>  | Heat-labile cytotoxic enterotoxin | AAAGCGTCTGACAGCGAAGT<br>AGCGCATAGGCGTTCTCTT                               | 320           | [50]      |
| <i>ast</i>  | Heat-stable cytotoxic enterotoxin | ATCGTCAGCGACAGCTTCTT<br>CTCATCCCTTGGCTTGTTGT                              | 504           | [50]      |
| <i>fla</i>  | Flagellin                         | TCCAACCGTYTGACCTC<br>GMYTGTTGCGRATGGT                                     | 608           | [49]      |
| <i>hlyA</i> | Hemolysin                         | ATGAGTTTTGCCGATAGTTTATTTTTCCTGA<br>TTACGATTCCTGAGCGGGCTTGTCGGCCGGCG<br>TG | 1320          | [51]      |

**Table S2:** Antimicrobials evaluated and respective concentrations and applied cutoff points.

| Antimicrobial                 | Concentration<br>(µg/mL) | CLSI breakpoints <sup>1</sup>    |               |           |
|-------------------------------|--------------------------|----------------------------------|---------------|-----------|
|                               |                          | Susceptible                      | Intermediate  | Resistant |
| Cefepime                      | 30                       | ≥25                              | 19-24         | ≤18       |
| Cefoxitin                     | 30                       | ≥18                              | 15-17         | ≤14       |
| Ceftazidime                   | 30                       | ≥21                              | 18-20         | ≤17       |
| Ceftriaxone                   | 30                       | ≥23                              | 20-22         | ≤19       |
| Imipenem                      | 10                       | ≥23                              | 20-22         | ≤19       |
| Piperacillin-tazobactam       | 110                      | ≥21                              | 18-20         | ≤17       |
| Tetracycline                  | 30                       | ≥15                              | 12-14         | ≤11       |
| Enrofloxacin <sup>2</sup>     | 5                        | ≥23                              | 17-22         | ≤16       |
| Ciprofloxacin                 | 5                        | ≥21                              | 16-20         | ≤15       |
| Amikacin                      | 30                       | ≥17                              | 15-16         | ≤14       |
| Gentamicin <sup>2</sup>       | 10                       | ≥16                              | 13-15         | ≤12       |
| Erythromycin                  | 15                       | ≥23                              | 14-22         | ≤13       |
| Chloramphenicol               | 30                       | ≥18                              | 13-17         | ≤12       |
| Florfenicol <sup>2</sup>      | 30                       | ≥22                              | 19-21         | ≤18       |
| Sulfonamide                   | 300                      | ≥17                              | 13-16         | ≤12       |
| Trimethoprim-sulfamethoxazole | 25                       | ≥16                              | 11-15         | ≤10       |
| Antimicrobial                 | Concentration<br>(µg/mL) | ECOFF cutoff points <sup>3</sup> |               |           |
|                               |                          | Wild Type                        | Non-Wild Type |           |
| Enrofloxacin                  | 5                        | ≥32                              | ≤31           |           |
| Florfenicol                   | 30                       | ≥25                              | ≤24           |           |
| Gentamicin                    | 10                       | ≥19                              | ≤18           |           |

<sup>1</sup> CLSI - M100, 32nd ed [20]. <sup>2</sup> CLSI - VET 01S – 5th ed [23]. <sup>3</sup> CLSI - VET04, 3rd ed [19].
